# Supplementary material
Source: PubMed Central journal article supplement (PMC3679202)

**A**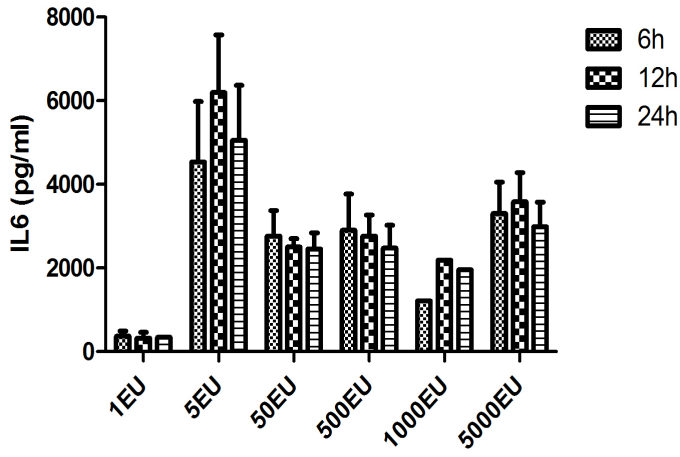**B**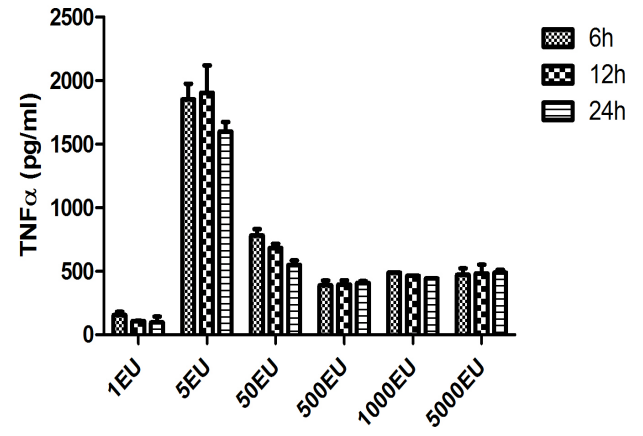**C**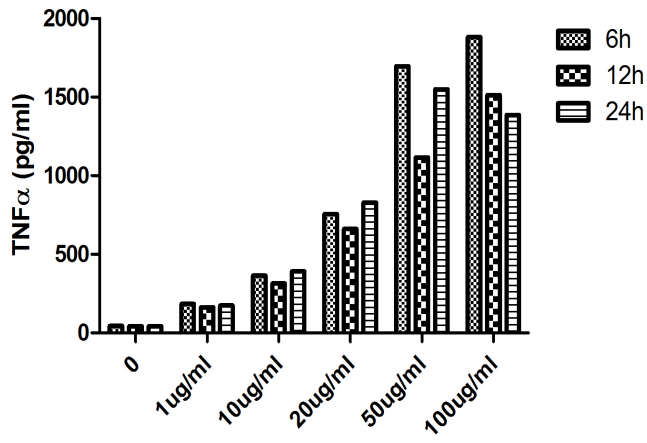

Supplemental Figure 1.

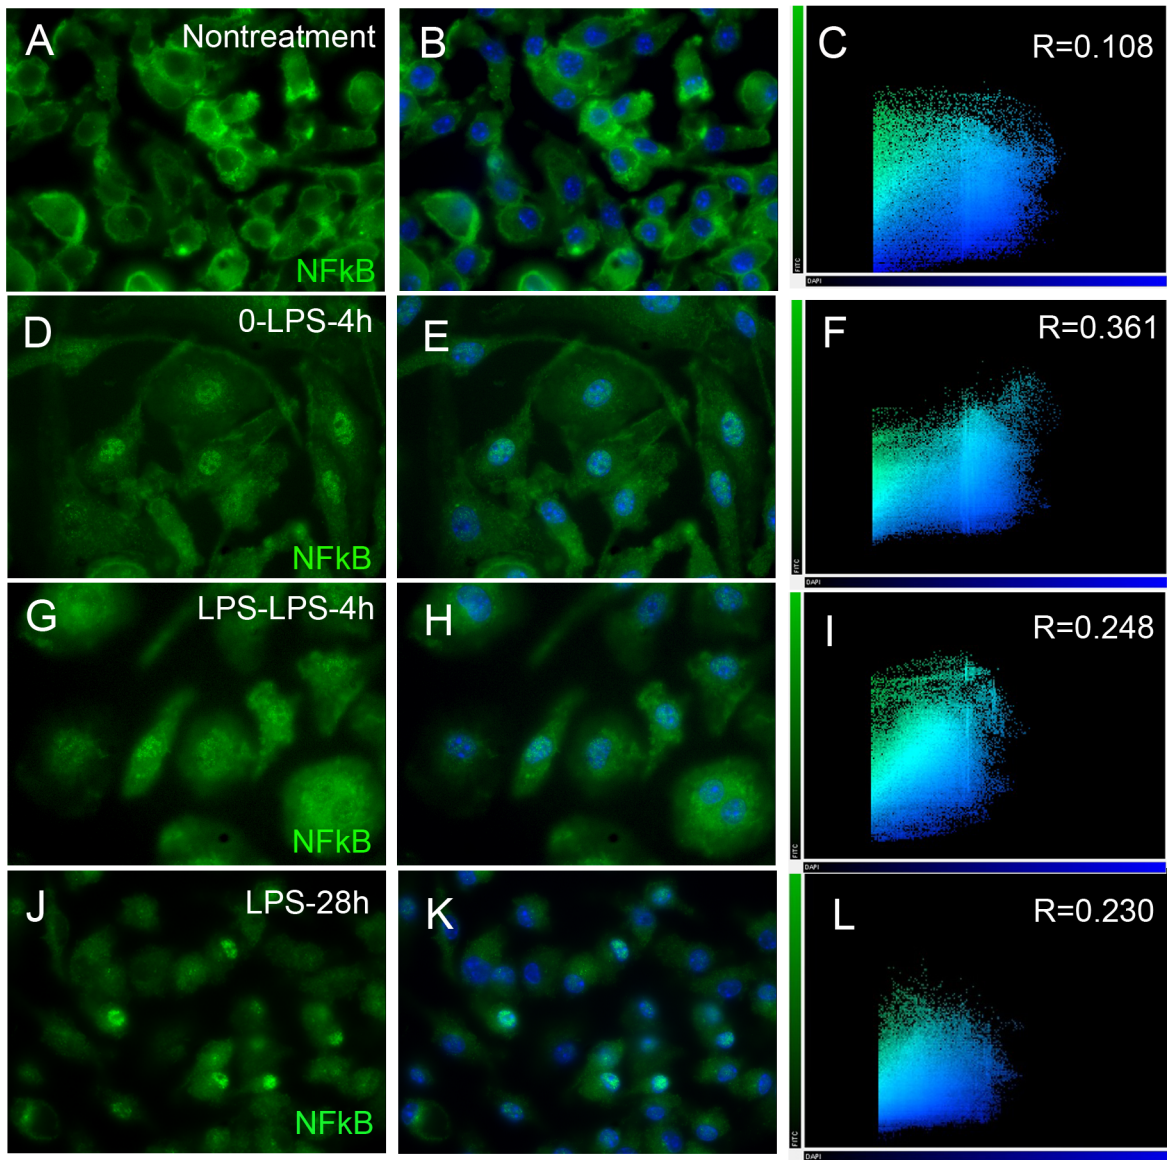

Supplemental Figure 2.

**A**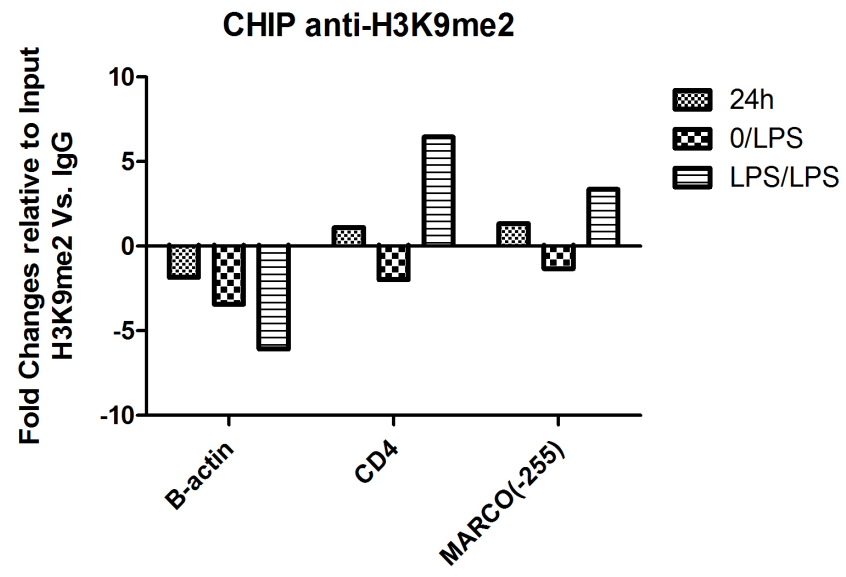**B**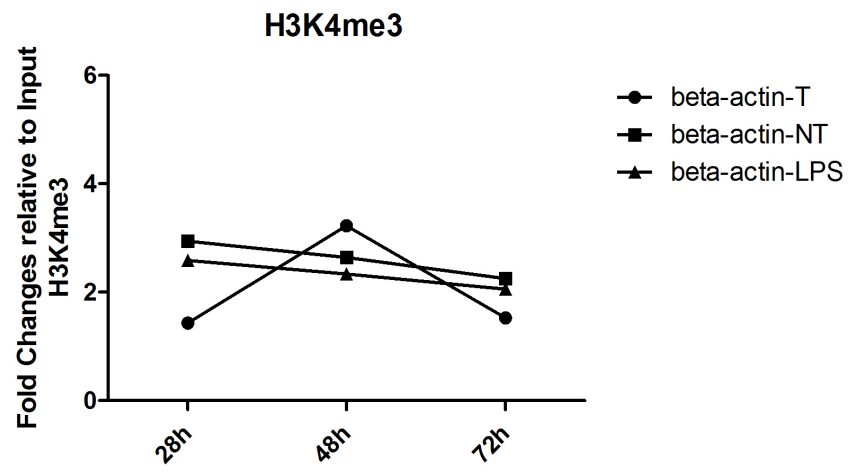**C**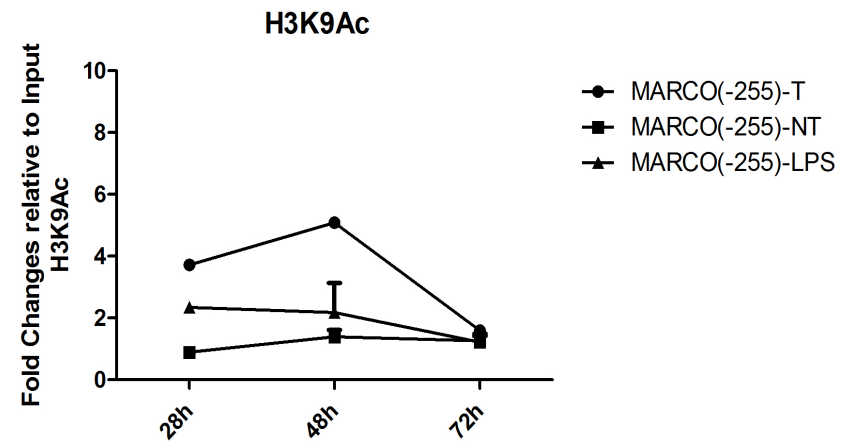

Supplemental Figure 3.

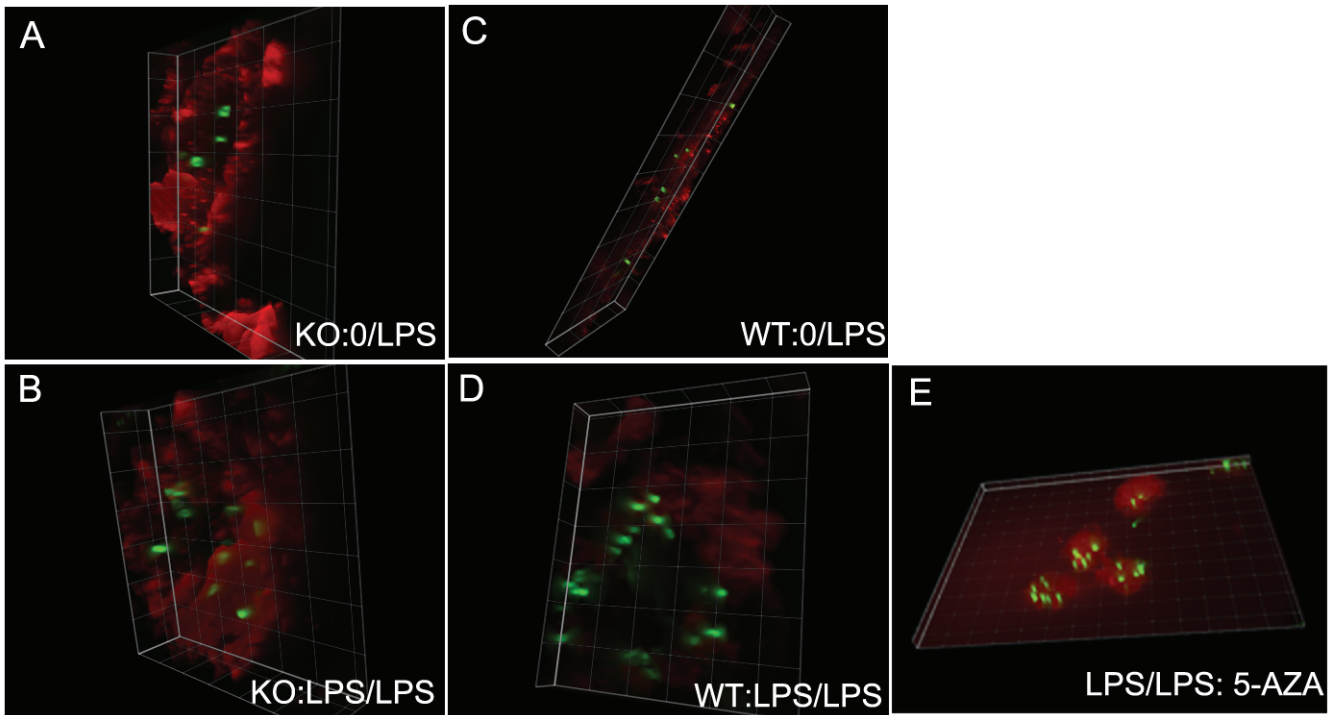

Supplemental Figure 4.

Supplement: NIHMS465075-supplement-1.pdf [file NIHMS465075-supplement-1.pdf]
